# Supplementary material for: The chromatin-remodeling enzyme CHD3 plays a role in embryonic viability but is dispensable for early vascular development
Source: PubMed Central journal article supplement (PMC7357745; doi:10.1371/journal.pone.0235799), 2020-07-13

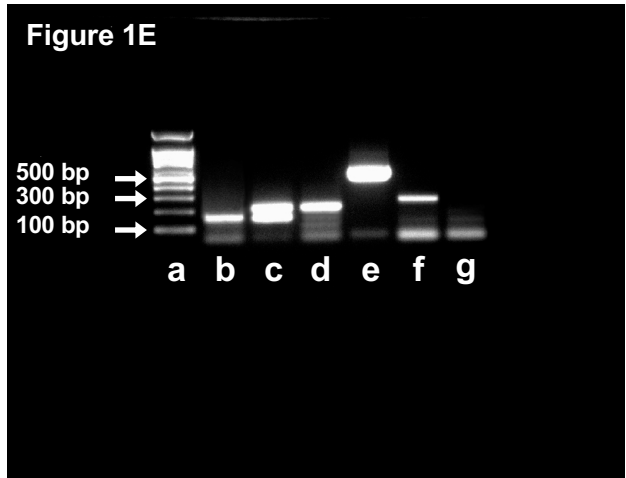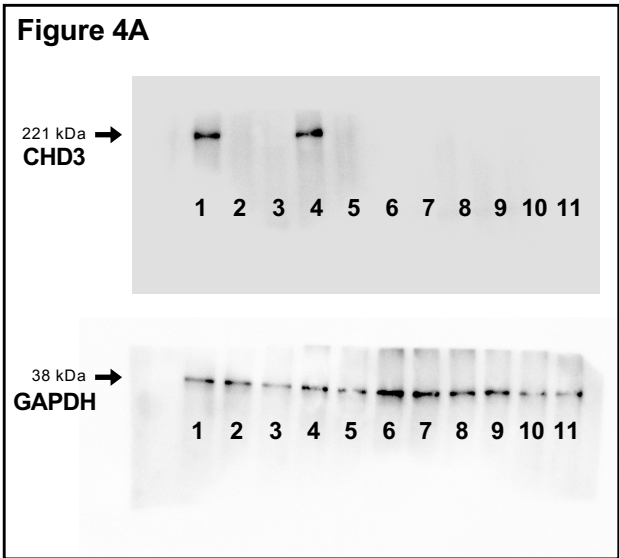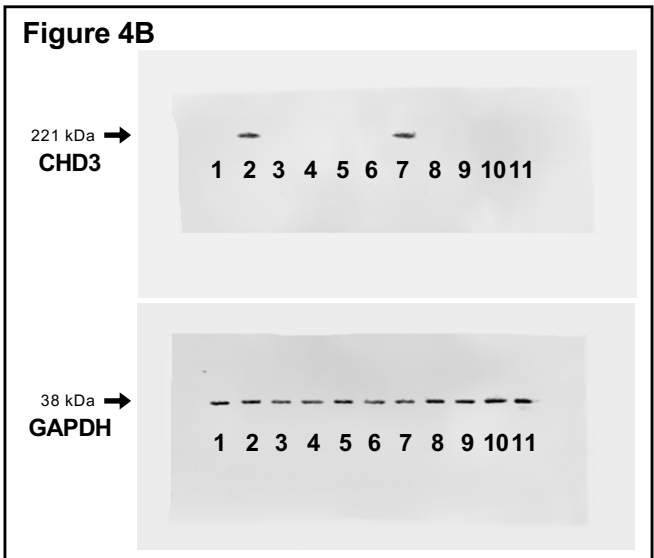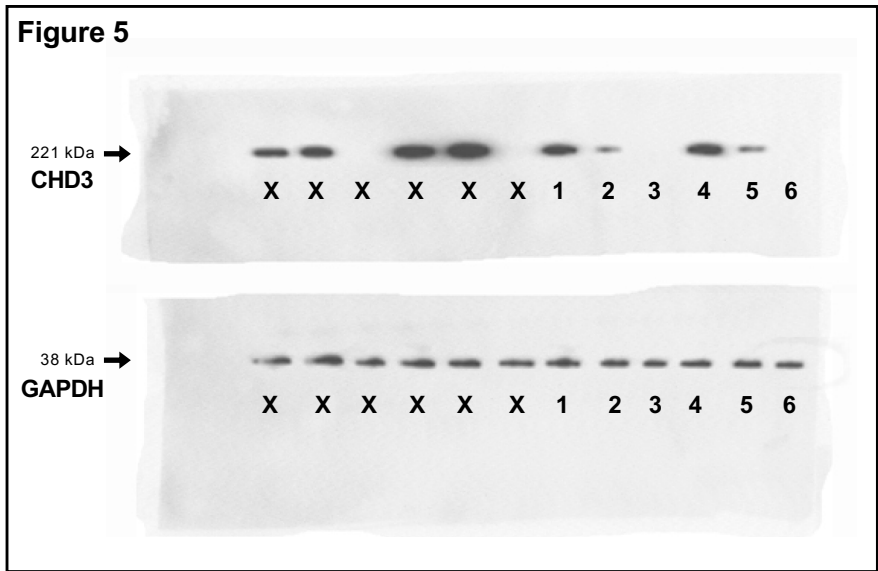

Supplement: pone.0235799.s001.pdf [file pone.0235799.s001.pdf]
